# Supplementary material
Source: MDPI journal article supplement (https://www.mdpi.com/1424-8247/14/9/874)
Supplement: s1 [file s1]

## Supplementary Materials

### PRODH/POX-dependent celecoxib-induced apoptosis in MCF-7 breast cancer.

**Magdalena Misiura <sup>1†</sup>, Ilona Ościłowska <sup>2†</sup>, Katarzyna Bielawska <sup>1</sup>, Jerzy Pałka <sup>2</sup> and Wojciech Milyk <sup>1,\*</sup>**

<sup>1</sup> Department of Analysis and Bioanalysis of Medicines, Medical University of Białystok, Kilińskiego 1, 15-089 Białystok, Poland, phone: +48-85-748-5845; e-mail: magdalena.misiura@umb.edu.pl (M.M.); katarzyna.bielawska@umb.edu.pl (K.B.); wojciech.milyk@umb.edu.pl (W.M.)

<sup>2</sup> Department of Medicinal Chemistry, Medical University of Białystok, Kilińskiego 1, 15-089 Białystok, Poland, phone: +48-85-748-5706; e-mail: ilona.zareba@gmail.com (I.O.); pal@umb.edu.pl (J.P.)

\* Correspondence: wojciech.milyk@umb.edu.pl; Tel.: +48-85-748-5845

† These authors contributed equally to this work.

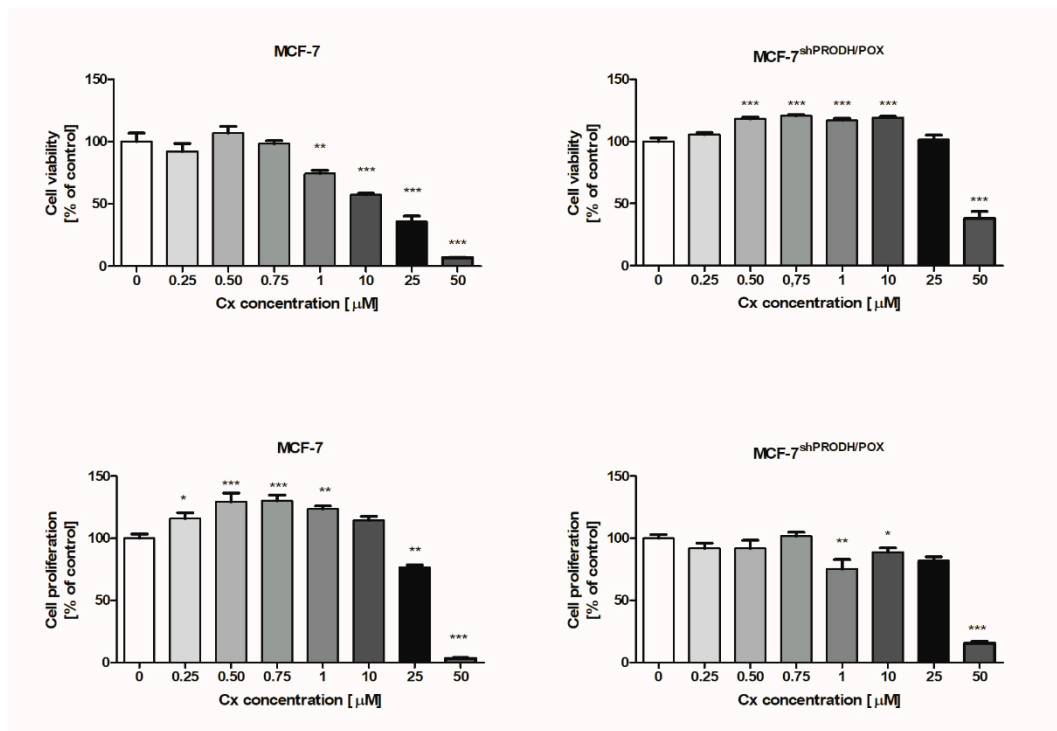

**Figure S1.** MCF-7 and MCF-7<sup>shPRODH/POX</sup> cell viability and proliferation after 48 h treatment with a wide range of Celecoxib concentrations. \*  $p < 0.05$ , \*\*  $p < 0.01$  and \*\*\*  $p < 0.001$ .

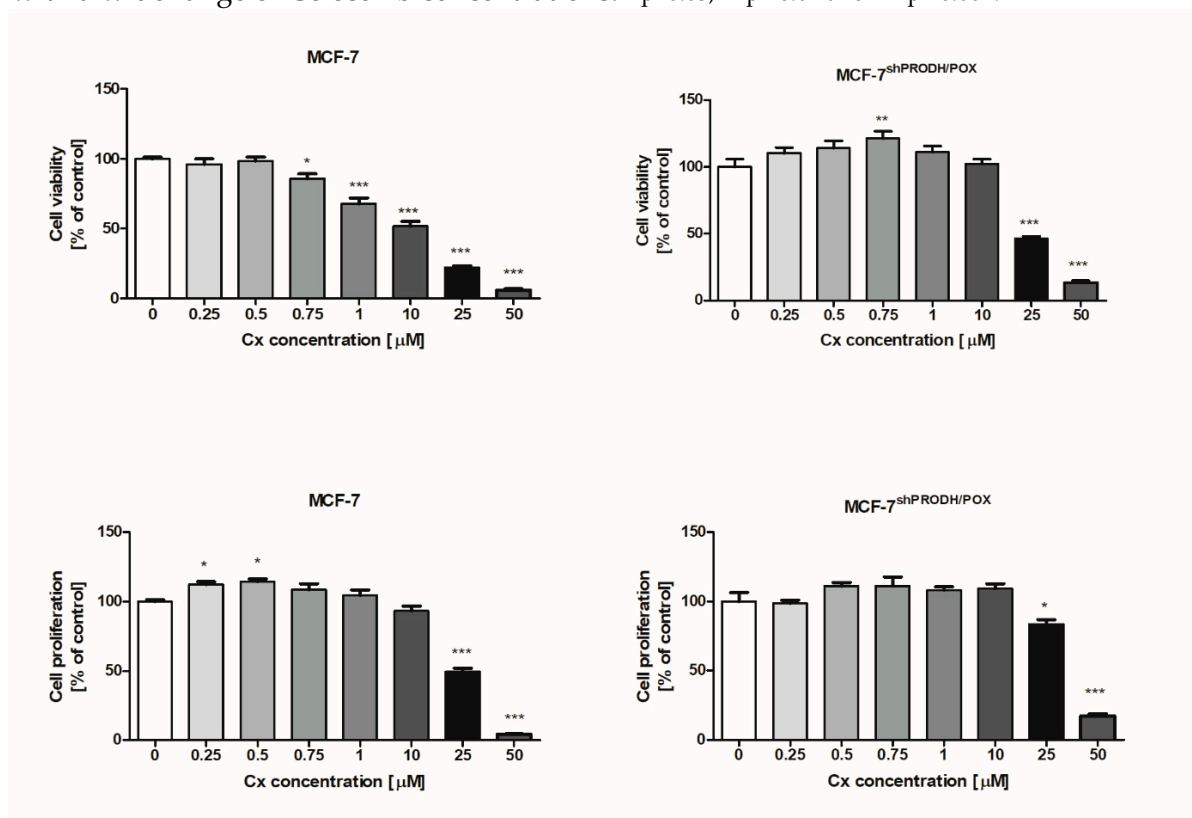

**Figure S2.** MCF-7 and MCF-7<sup>shPRODH/POX</sup> cell viability and proliferation after 72 h treatment with a wide range of Celecoxib concentrations. \*  $p < 0.05$ , \*\*  $p < 0.01$  and \*\*\*  $p < 0.001$ .

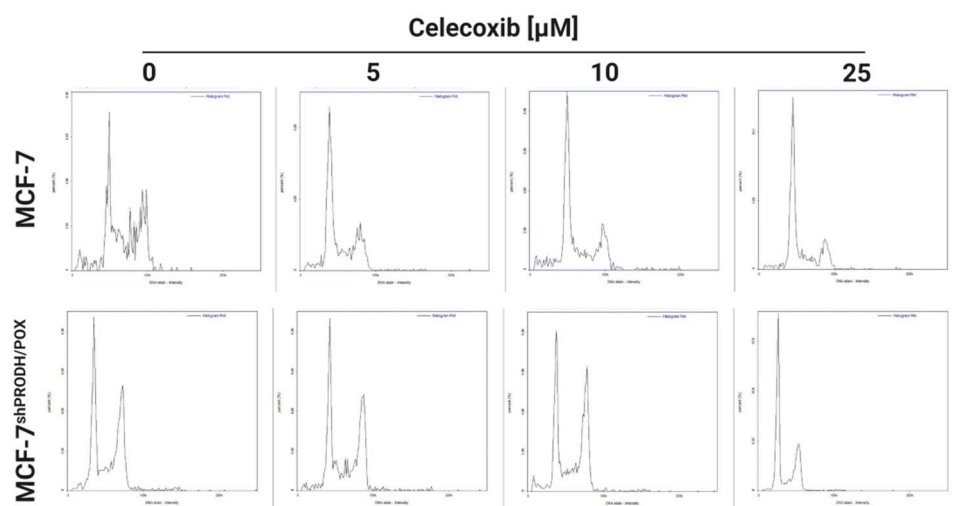

**Figure S3.** Graphical representation of the cell cycle Analysis upon Cx treatment for 24 h. MCF-7 and MCF-7<sup>shPRODH/POX</sup> cells were treated with 0, 5, 10 and 25  $\mu\text{M}$  of Cx.

### Bax protein expression

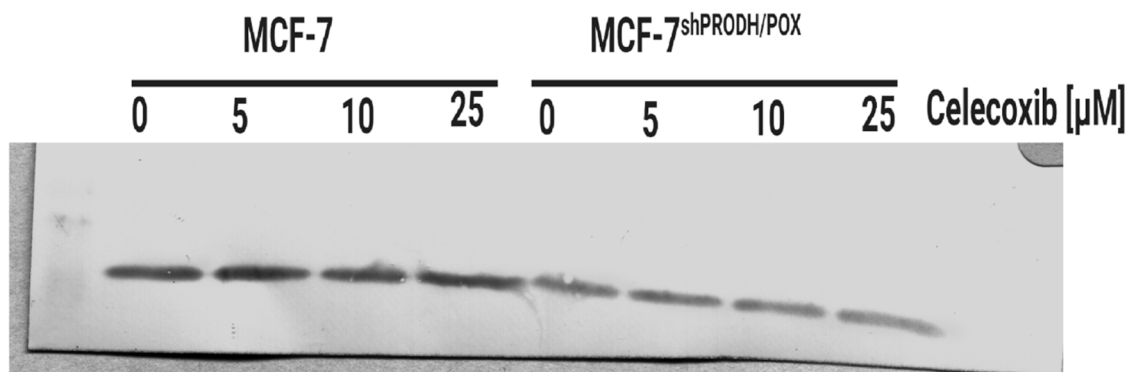

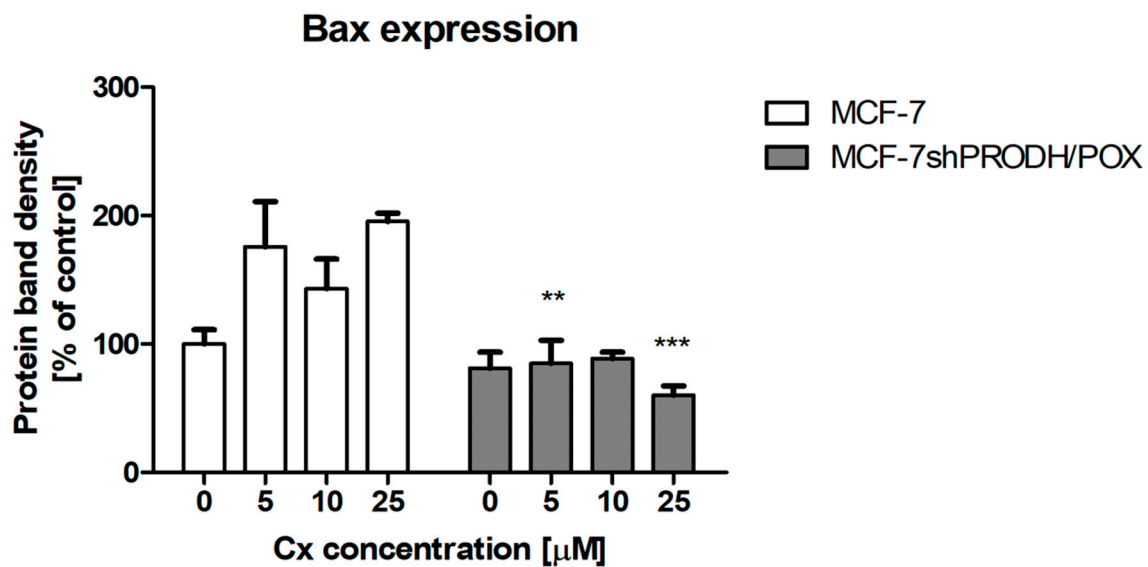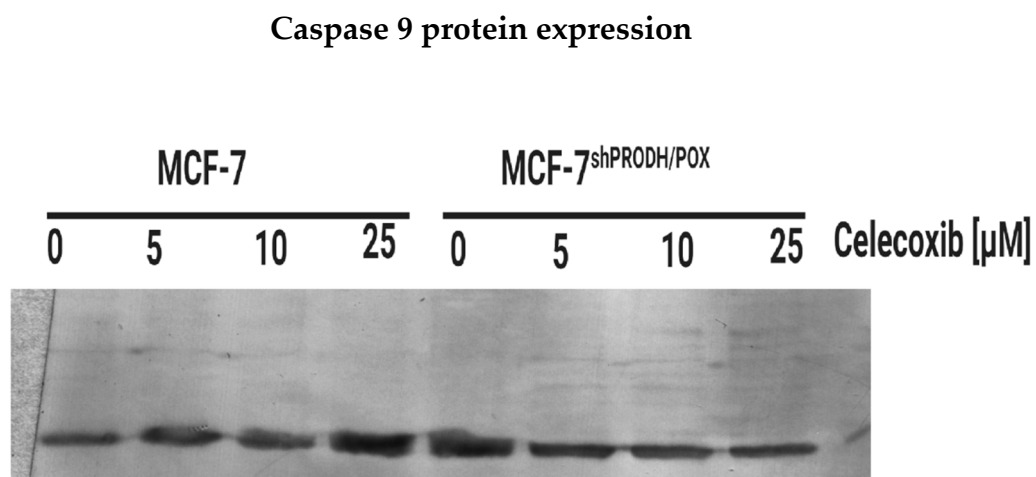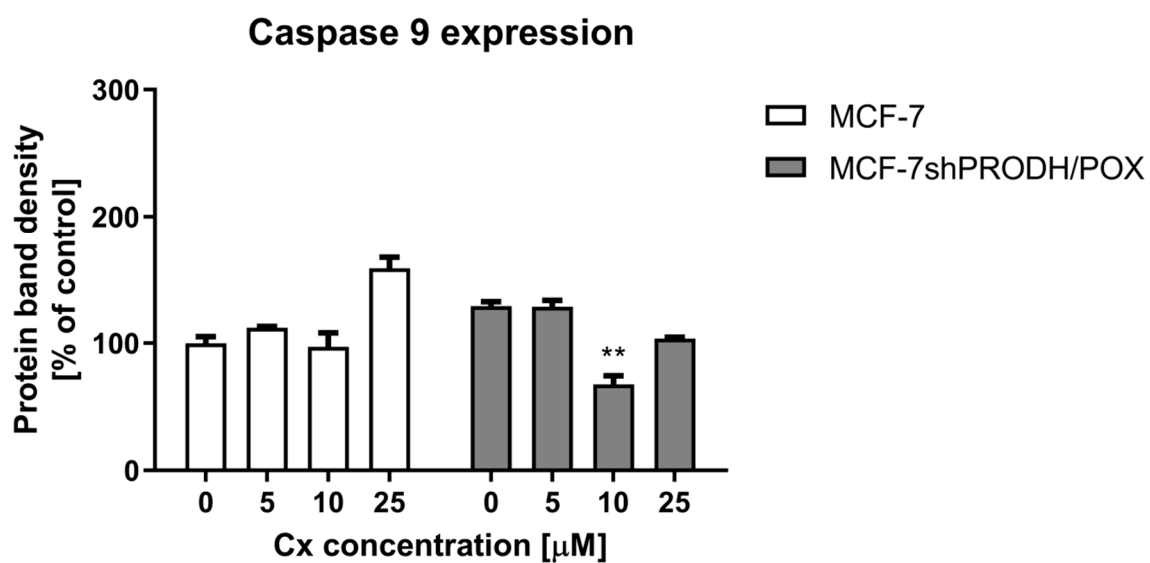

Cleaved Caspase 9 protein expression

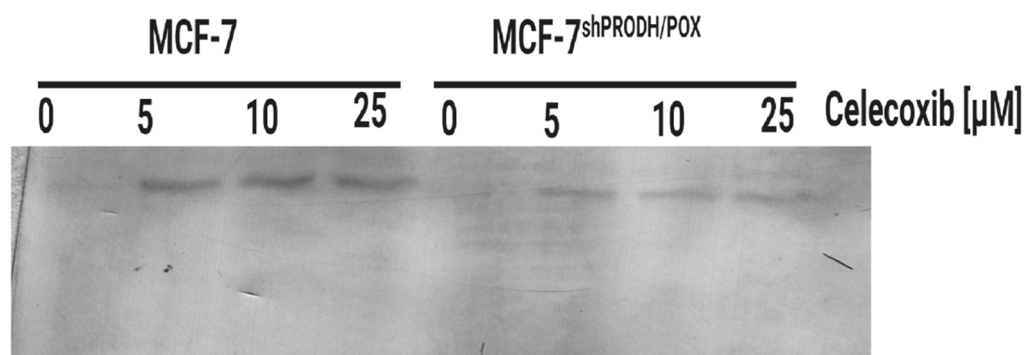

**Cleaved Caspase 9 expression**

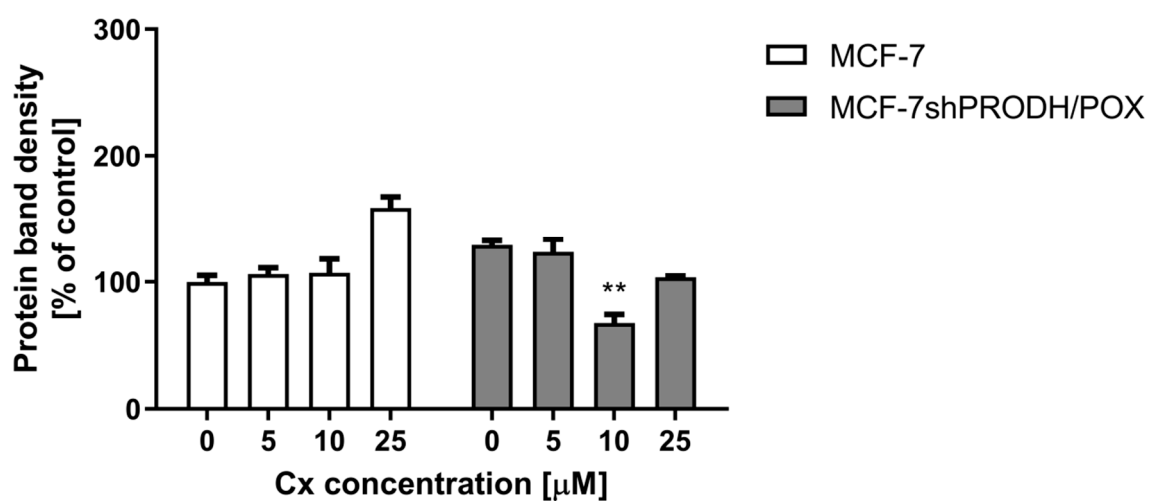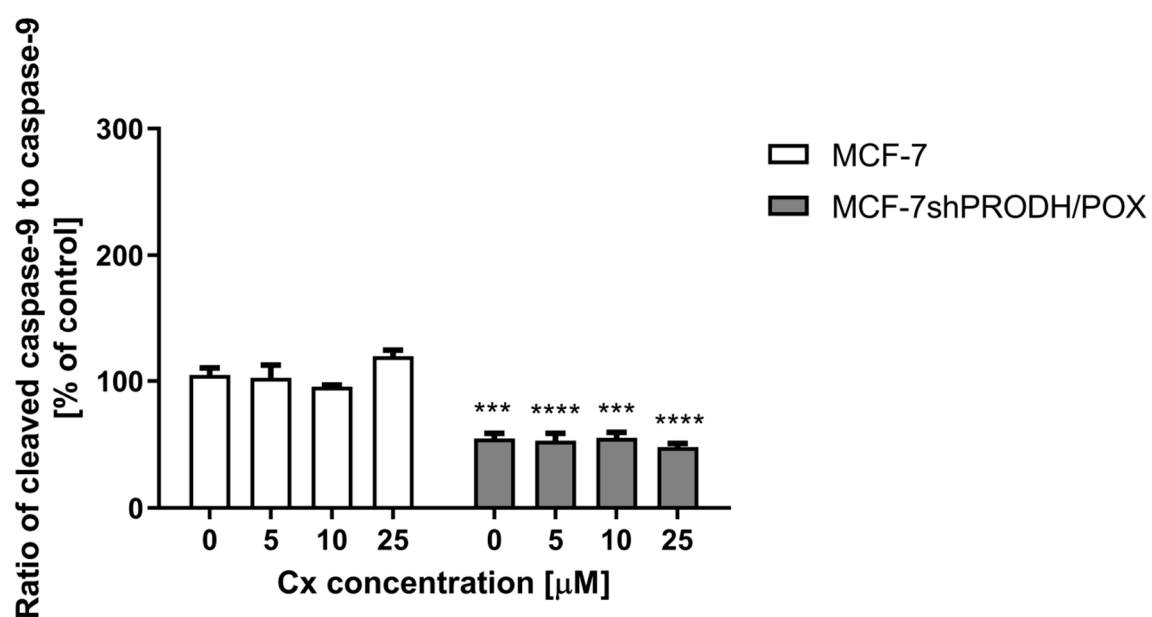

**PARP protein expression**

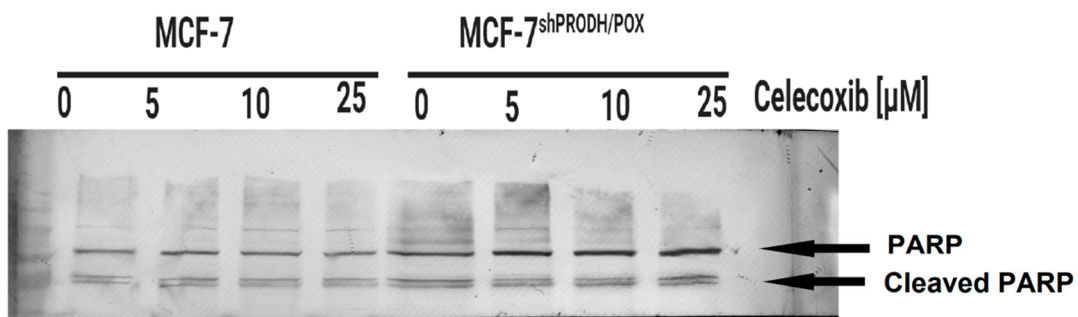

### PARP expression

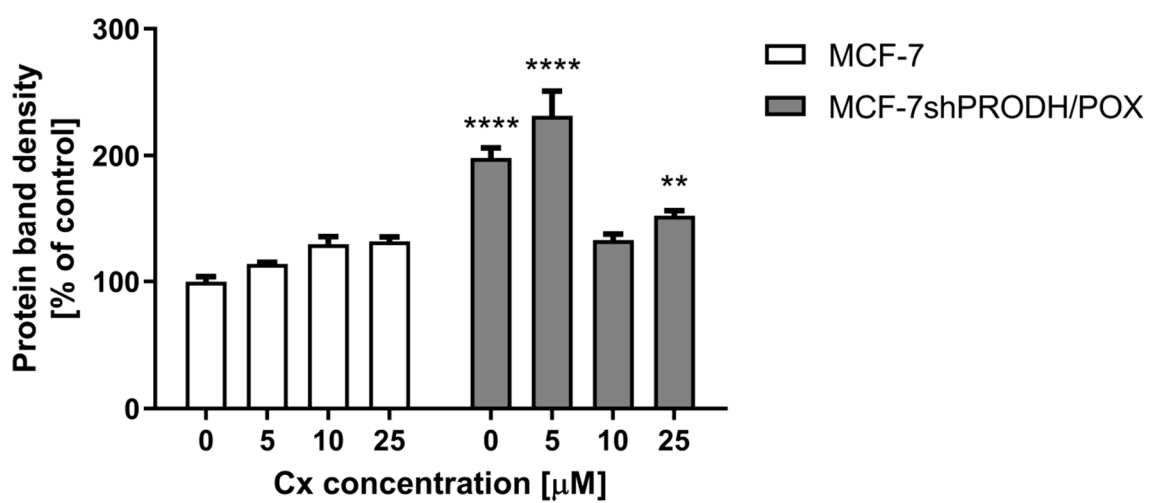

### Cleaved PARP protein expression

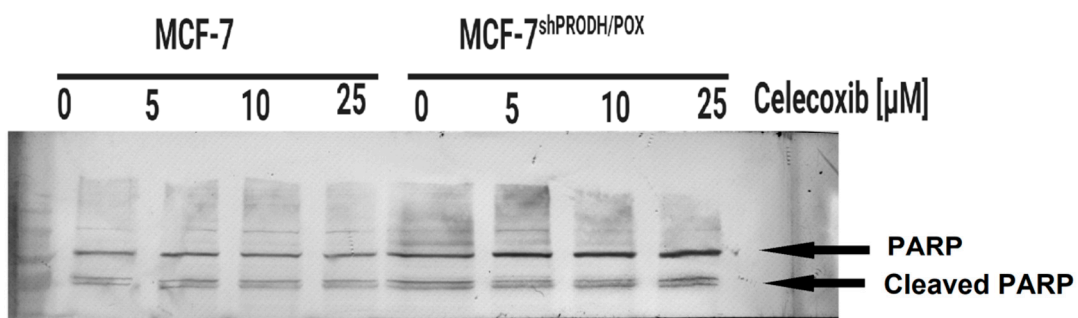

### Cleaved PARP expression

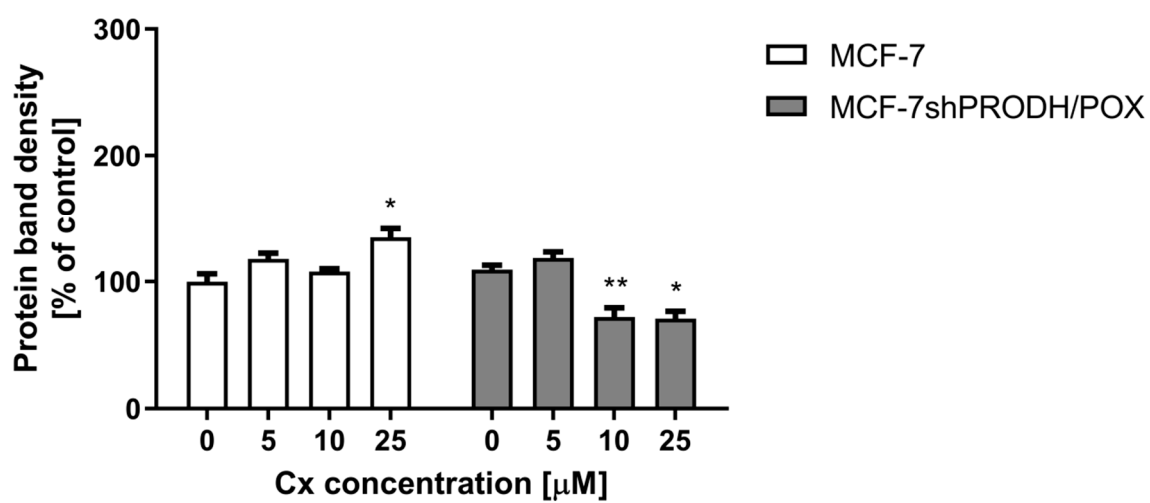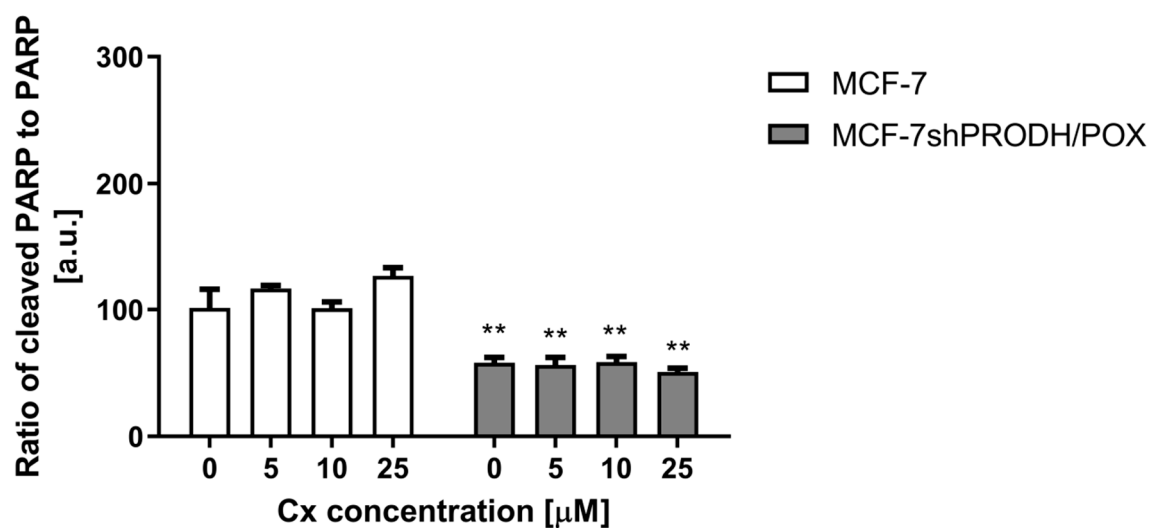

### Atg5 protein expression

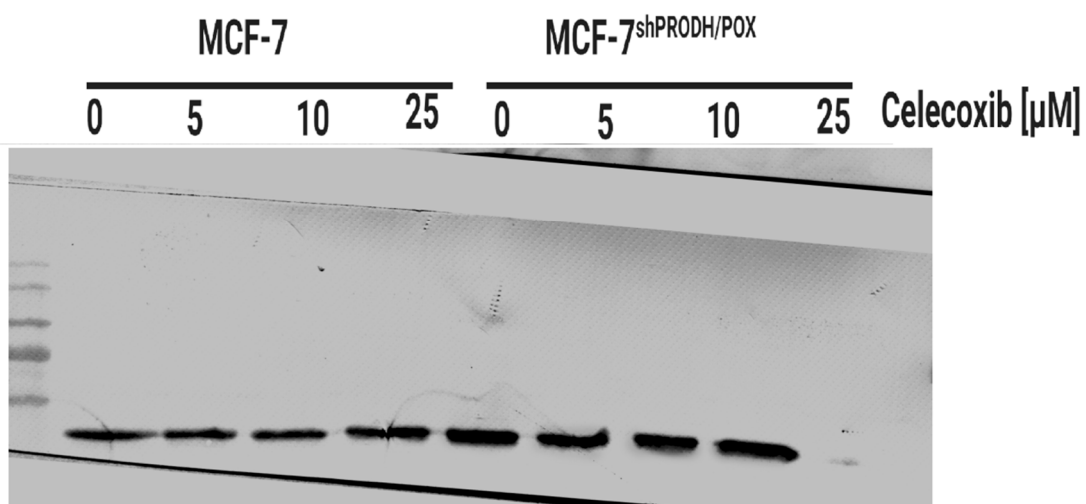

### Beclin 1 protein expression

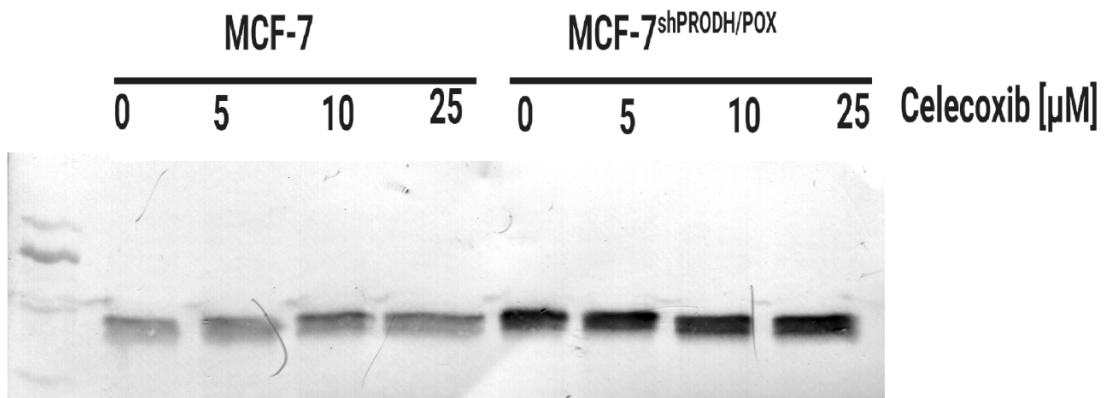

### Beclin 1 expression

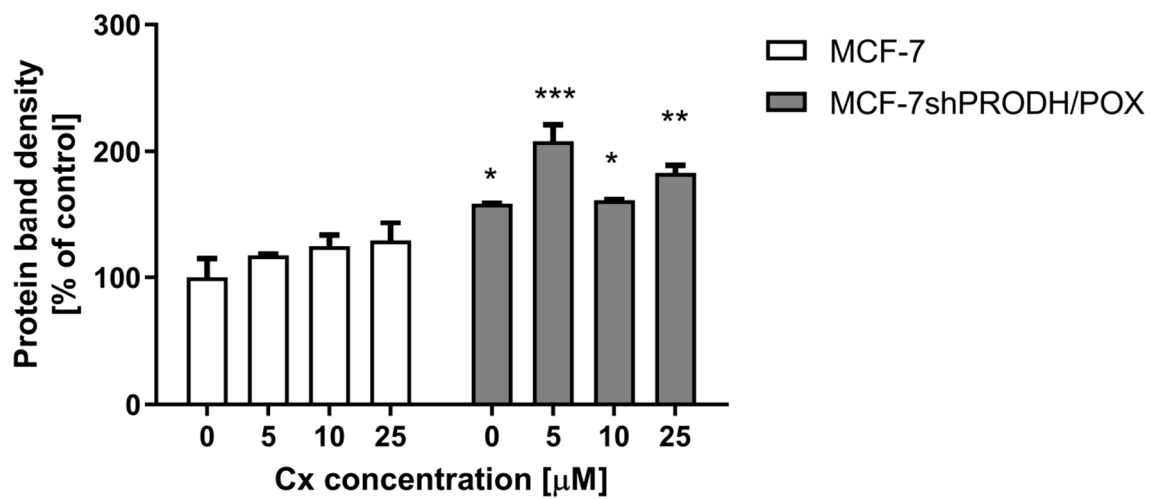

### LC3A/B protein expression

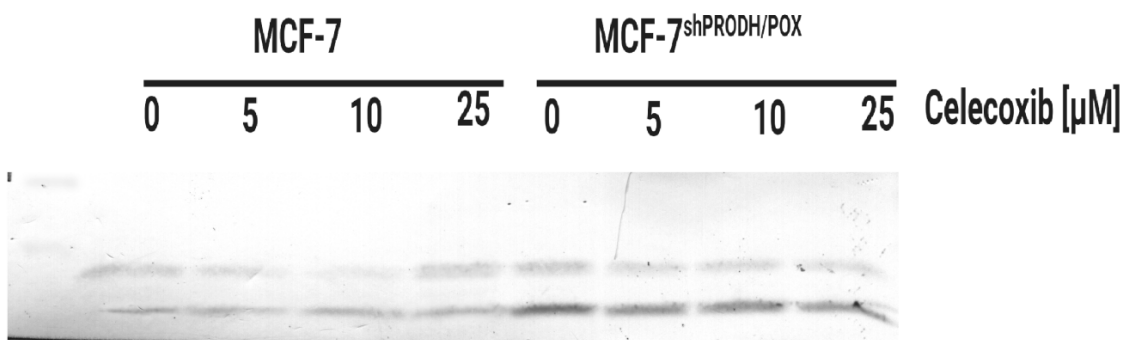



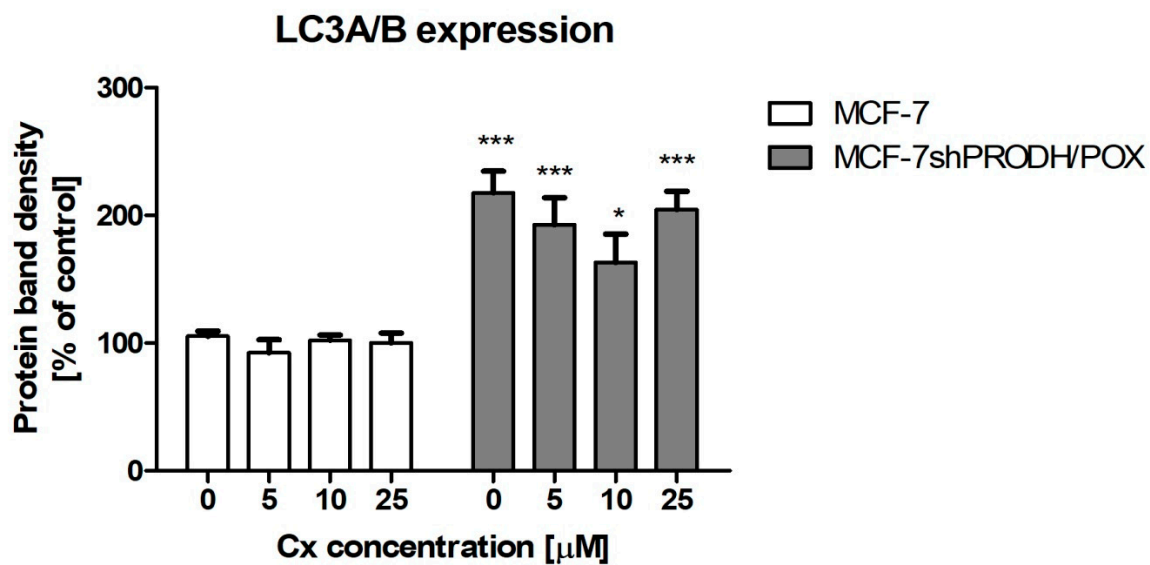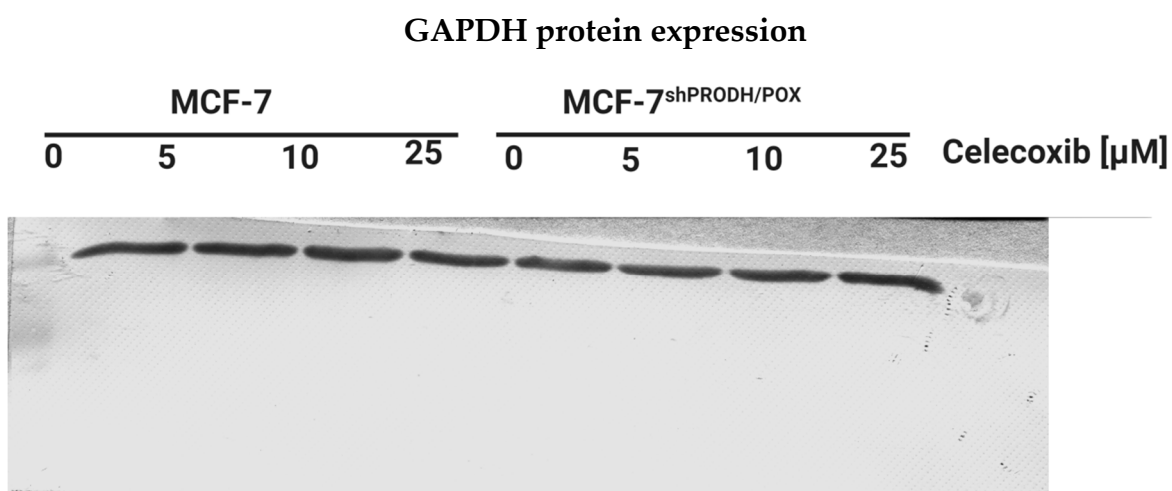

**Figure S4.** Western immunoblots with densitometric analysis presented in Fig. 2.

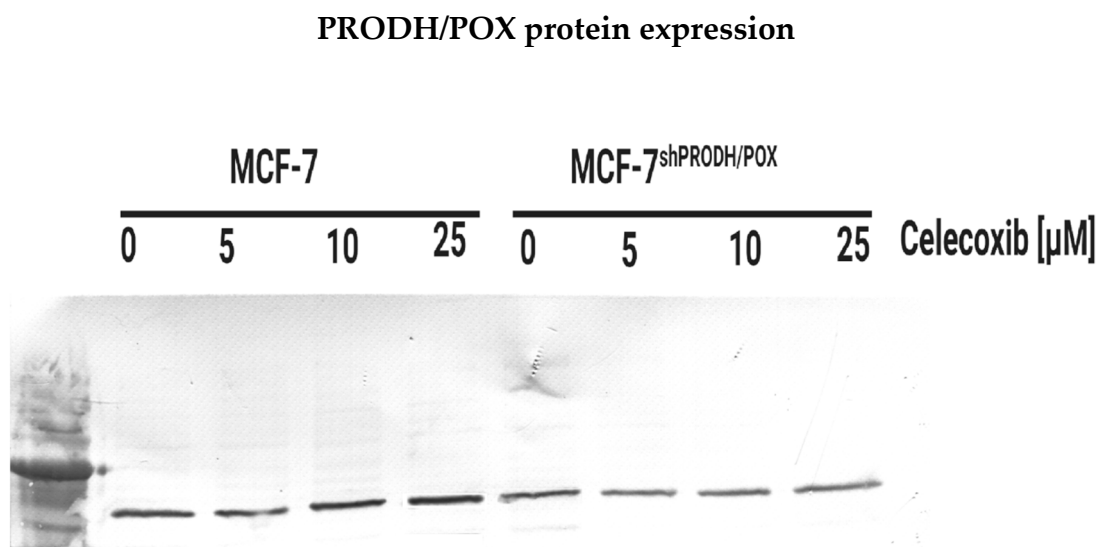

### PRODH/POX expression

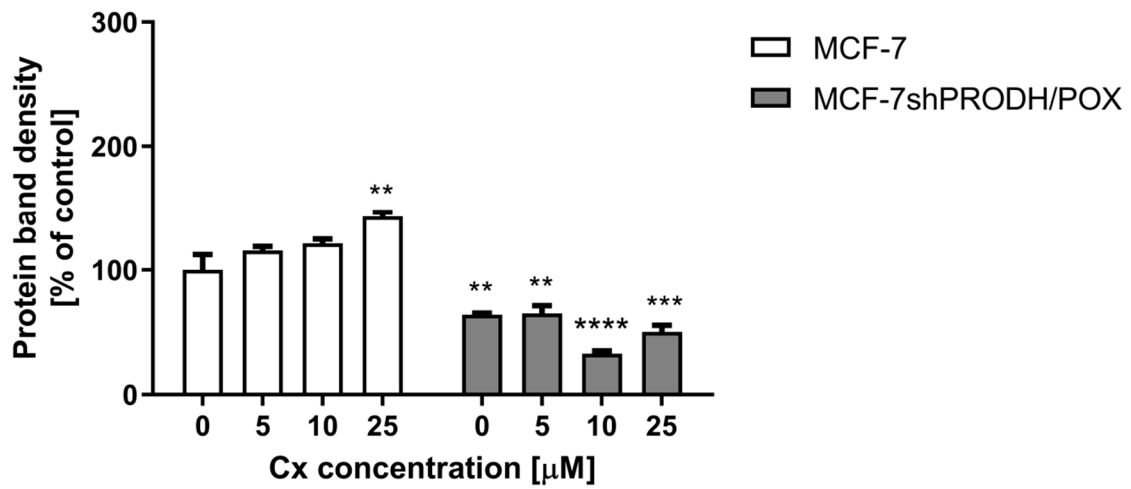

### PYCR1 protein expression

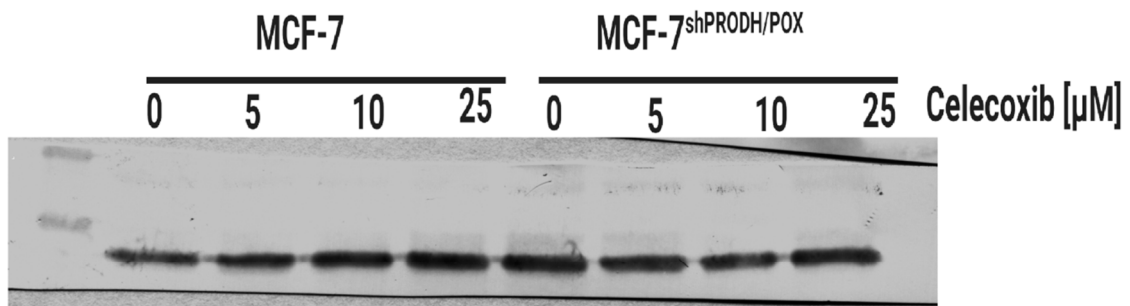

### PYCR1 expression

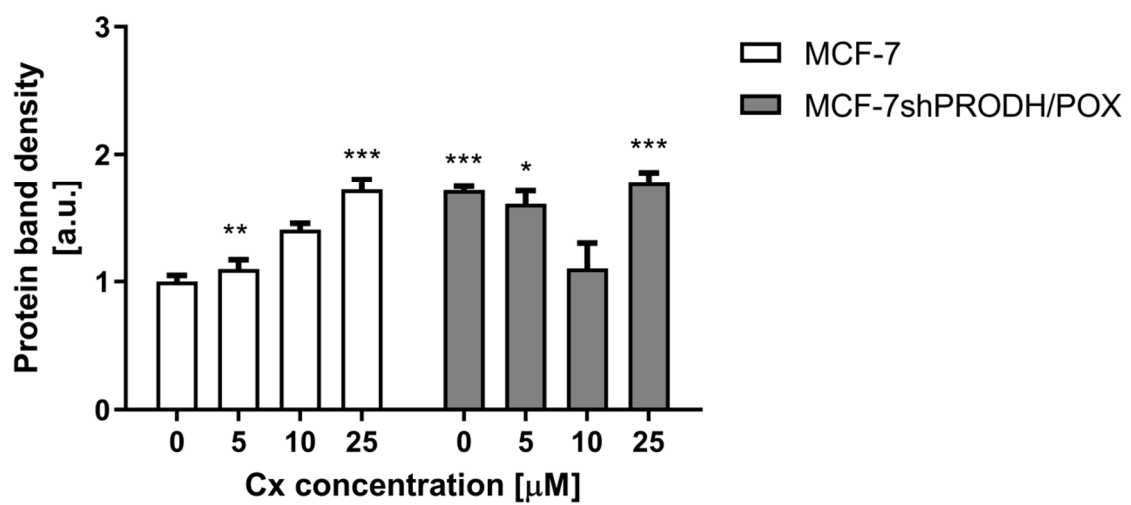

### PYCR2 protein expression

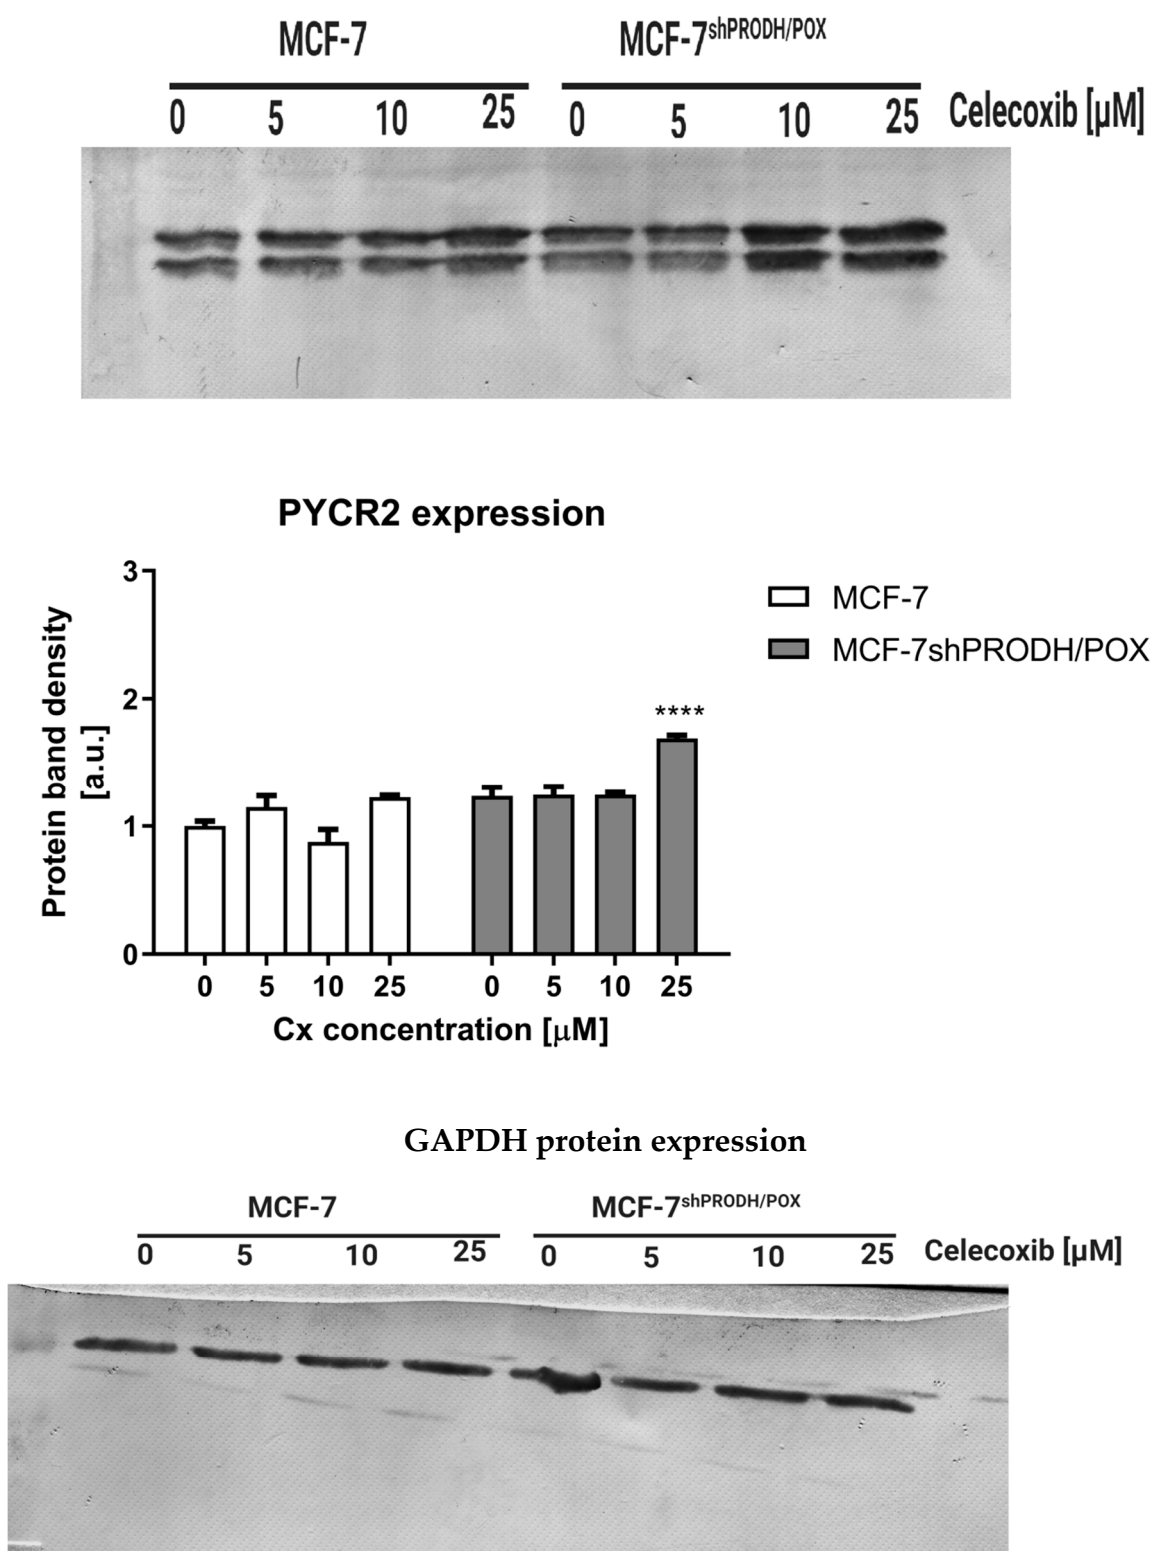

**Figure S5.** Representative blots with densitometric analysis presented in Fig. 3.

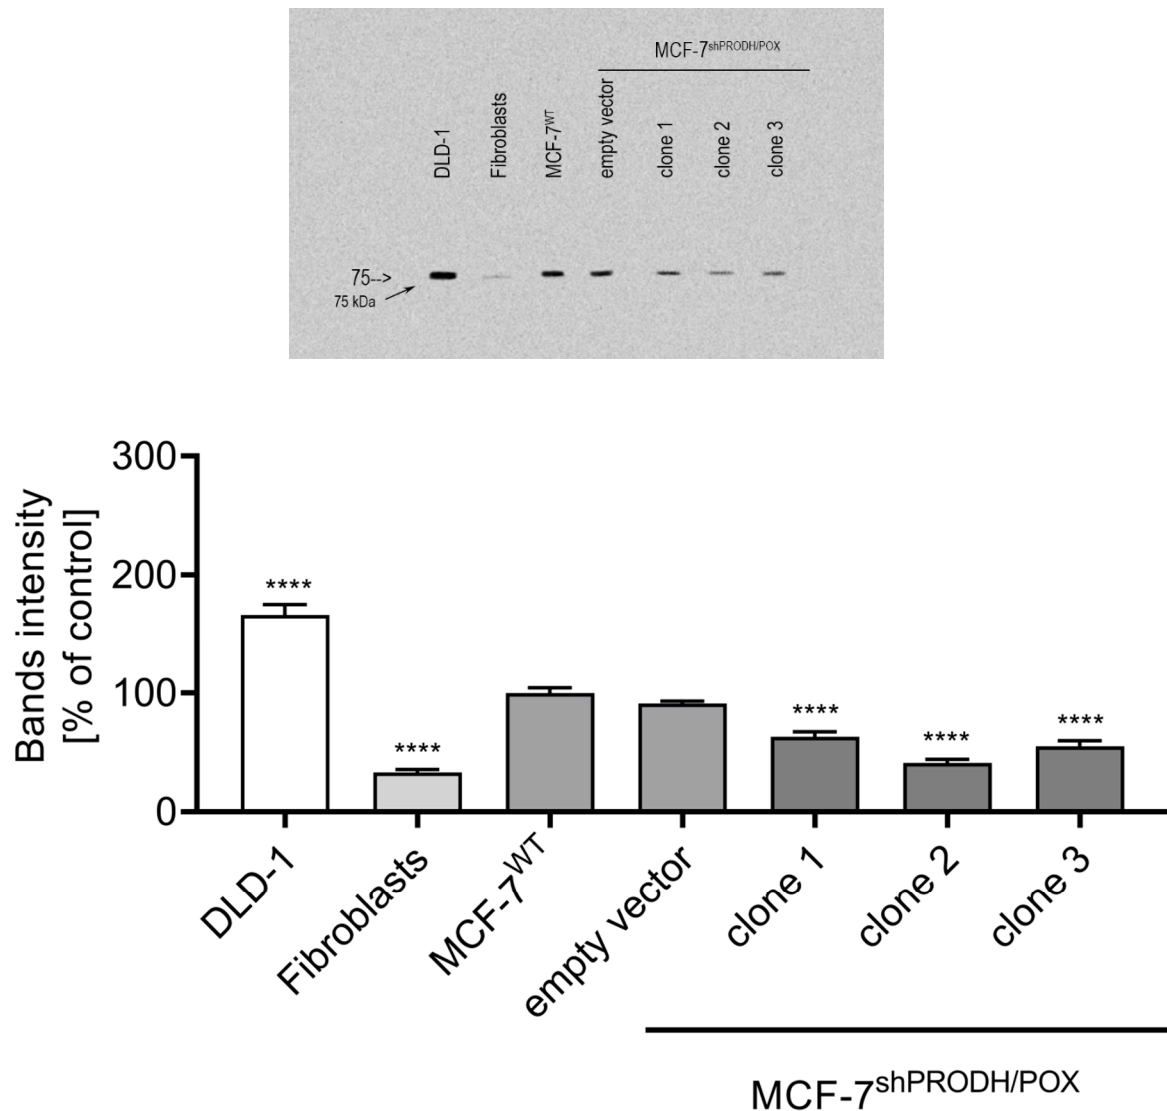

**Figure S6.** Efficacy of shRNA-based PRODH/POX knock-down in MCF-7 cells. PRODH/POX protein expression in non-treated DLD-1, fibroblasts, MCF-7, and MCF-7<sup>shPROD</sup>/POX cell lysates analyzed by Western immunoblotting as previously published [1]. DLD-1 cells were used as a positive control and fibroblasts as a negative control for the expression of PRODH/POX. Transfection of the MCF-7 cells with different PRODH/POX shRNA constructs (clone 1-3) were done. Representative blot is presented and the intensity of POX bands was quantified by densitometry and normalized to GAPDH, values represent the mean (% of control)  $\pm$  SD of three experiments, \*P < 0.001.

## References

1. Zareba, I.; Surazynski, A.; Chrusciel, M.; Mityk, W.; Doroszko, M.; Rahman, N.; Palka, J. Functional Consequences of Intracellular Proline Levels Manipulation Affecting PRODH/POX-Dependent Pro-Apoptotic Pathways in a Novel in Vitro Cell Culture Model. *Cell Physiol Biochem* **2017**, *43*, 670-684, doi:10.1159/000480653.
